# Supplementary material
Source: publisher figshare collection journal article supplement (https://acs.figshare.com/ndownloader/files/4461079)
Supplement: Supplementary file 1 [file 4461079]

#======================================================================
 
data_RIETAN_publ
 
#======================================================================
 
_audit_creation_date  2010-01-05
_audit_creation_method  'Converted from *.lst using lst2cif'
 
#======================================================================
 
# SUBMISSION DETAILS
 
 
_publ_contact_author_name          '?'
_publ_contact_author_address
;
;
_publ_contact_author_email         ?
_publ_contact_author_fax           '?'
_publ_contact_author_phone         '?'
 
_publ_requested_journal            '?'
_publ_requested_category           ?
 
_publ_contact_letter
;
;
 
 
#======================================================================
 
# PROCESSING SUMMARY (IUCr Office Use Only)
 
#_journal_date_recd_electronic
#_journal_date_to_coeditor
#_journal_date_from_coeditor
#_journal_date_accepted
#_journal_date_printers_first
#_journal_date_printers_final
#_journal_date_proofs_out
#_journal_date_proofs_in
#_journal_coeditor_name
#_journal_coeditor_code
#_journal_coeditor_notes
#_journal_techeditor_code
#_journal_paper_category
#_journal_compatibility_tag
#_journal_techeditor_notes
#_journal_coden_ASTM
#_journal_name_full
#_journal_year
#_journal_volume
#_journal_issue
#_journal_page_first
#_journal_page_last
#_journal_suppl_publ_number
#_journal_suppl_publ_pages
 
 
#======================================================================
 
# TITLE AND AUTHOR LIST
 
_publ_section_title
;
;
 
# The loop structure below should contain the names and addresses of all
# authors, in the required order of publication. Repeat as necessary.
 
loop_
   _publ_author_name
   _publ_author_address
   '?'
;
;
 
 
#======================================================================
 
# TEXT
 
_publ_section_synopsis
;
;
 
_publ_section_abstract
;
;
 
_publ_section_comment
;
;
 
_publ_section_exptl_prep
;
;
 
_publ_section_exptl_refinement
;
;
 
_publ_section_references
;
;
 
_publ_section_figure_captions
;
;
 
_publ_section_acknowledgements
;
;
 
 
#======================================================================
 
# CRYSTAL DATA
 
#----------------------------------------------------------------------
data_RIETAN_phase_1
 
_pd_block_id
      '2010-01-05|PHASE_01|..creator_name..|..instr_name..'
 
_pd_phase_name                         La2Co2Se2O3
_cell_length_a                         4.0697(8)       
_cell_length_b                         4.06965          
_cell_length_c                         18.419(4)       
_cell_angle_alpha                      90.0                
_cell_angle_beta                       90.0                
_cell_angle_gamma                      90.0                
_cell_volume                           305.1(1)     
_cell_formula_units                    ?
_symmetry_cell_setting                 tetragonal     
_symmetry_space_group_name_H-M         'I 4/m m m'
_symmetry_Int_Tables_number            139
 
loop_
   _symmetry_equiv_pos_site_id
   _symmetry_equiv_pos_as_xyz
     1   x,y,z
     2   -x,-y,z
     3   -y,x,z
     4   y,-x,z
     5   -x,y,-z
     6   x,-y,-z
     7   y,x,-z
     8   -y,-x,-z
     9   -x,-y,-z
    10   x,y,-z
    11   y,-x,-z
    12   -y,x,-z
    13   x,-y,z
    14   -x,y,z
    15   -y,-x,z
    16   y,x,z
    17   x+1/2,y+1/2,z+1/2
    18   -x+1/2,-y+1/2,z+1/2
    19   -y+1/2,x+1/2,z+1/2
    20   y+1/2,-x+1/2,z+1/2
    21   -x+1/2,y+1/2,-z+1/2
    22   x+1/2,-y+1/2,-z+1/2
    23   y+1/2,x+1/2,-z+1/2
    24   -y+1/2,-x+1/2,-z+1/2
    25   -x+1/2,-y+1/2,-z+1/2
    26   x+1/2,y+1/2,-z+1/2
    27   y+1/2,-x+1/2,-z+1/2
    28   -y+1/2,x+1/2,-z+1/2
    29   x+1/2,-y+1/2,z+1/2
    30   -x+1/2,y+1/2,z+1/2
    31   -y+1/2,-x+1/2,z+1/2
    32   y+1/2,x+1/2,z+1/2
 
loop_
   _atom_site_label
   _atom_site_symmetry_multiplicity
   _atom_site_occupancy
   _atom_site_fract_x
   _atom_site_fract_y
   _atom_site_fract_z
   _atom_site_thermal_displace_type
   _atom_site_B_iso_or_equiv
   _atom_site_type_symbol
   O1       4 1.0        0.5         0.0         0.25       Biso  0.8(3)    O2- 
   O2       2 1.0        0.5         0.5         0.0        Biso  1.2(4)    O2- 
   Se       4 1.0        0.0         0.0         0.09533(7) Biso  0.2(2)    Se  
   Co       4 1.0        0.5         0.0         0.0        Biso  0.3(2)    Co2+
   La       4 1.0        0.5         0.5         0.18370(5) Biso  0.2(2)    La3+
#----------------------------------------------------------------------
data_RIETAN_phase_2
 
_pd_block_id
      '2010-01-05|PHASE_02|..creator_name..|..instr_name..'
 
_pd_phase_name                         La2O3
_cell_length_a                         3.957(2)       
_cell_length_b                         3.95715          
_cell_length_c                         6.138(1)       
_cell_angle_alpha                      90.0                
_cell_angle_beta                       90.0                
_cell_angle_gamma                      120.0               
_cell_volume                           83.24(7)     
_cell_formula_units                    ?
_symmetry_cell_setting                 hexagonal      
_symmetry_space_group_name_H-M         'P 63/m m c'
_symmetry_Int_Tables_number            194
 
loop_
   _symmetry_equiv_pos_site_id
   _symmetry_equiv_pos_as_xyz
     1   x,y,z
     2   -y,x-y,z
     3   -x+y,-x,z
     4   -x,-y,z+1/2
     5   y,-x+y,z+1/2
     6   x-y,x,z+1/2
     7   y,x,-z
     8   x-y,-y,-z
     9   -x,-x+y,-z
    10   -y,-x,-z+1/2
    11   -x+y,y,-z+1/2
    12   x,x-y,-z+1/2
    13   -x,-y,-z
    14   y,-x+y,-z
    15   x-y,x,-z
    16   x,y,-z+1/2
    17   -y,x-y,-z+1/2
    18   -x+y,-x,-z+1/2
    19   -y,-x,z
    20   -x+y,y,z
    21   x,x-y,z
    22   y,x,z+1/2
    23   x-y,-y,z+1/2
    24   -x,-x+y,z+1/2
 
loop_
   _atom_site_label
   _atom_site_symmetry_multiplicity
   _atom_site_occupancy
   _atom_site_fract_x
   _atom_site_fract_y
   _atom_site_fract_z
   _atom_site_thermal_displace_type
   _atom_site_B_iso_or_equiv
   _atom_site_type_symbol
   La1      4 1.0        0.3333      0.6667      0.227(5)   Biso  0.2       La3+
   O3       2 1.0        0.0         0.0         0.0        Biso  0.7       O2- 
   O4       4 1.0        0.3333      0.6667      0.49(3)    Biso  0.7       O2- 
 
#======================================================================
 
# POWDER SPECIMEN AND EXPERIMENTAL DATA
 
data_RIETAN_p_01
 
_pd_block_id
      '2010-01-05|POWSET_01|..creator_name..|..instr_name..'
_pd_meas_datetime_initialed            ?
_pd_meas_info_author_name              "?"
_pd_meas_info_author_email             ?
_pd_meas_info_author_address
;
;
 
_pd_calc_method                       "Rietveld Refinement"
_diffrn_ambient_temperature           ?
_diffrn_ambient_environment           ?
_diffrn_source                        '?'
_diffrn_source_target                 ?
_diffrn_source_type                   ?
_diffrn_measurement_device_type       '?'
_diffrn_detector                      '?'
_diffrn_detector_type                 ?
_pd_meas_scan_method                  step
_pd_meas_special_details
;
;
_diffrn_radiation_type                'Cu K\\a~1~'
_diffrn_radiation_wavelength         1.54056
_diffrn_radiation_monochromator      none
 
_pd_meas_2theta_range_min        10.000   
_pd_meas_2theta_range_max        120.000  
_pd_meas_2theta_range_inc        0.020    
_pd_meas_number_of_points        5501        
 
 
#======================================================================
 
# REFINEMENT DATA
 
_pd_proc_ls_special_details
;
;
 
_pd_proc_ls_profile_function      ?
_pd_proc_ls_background_function   '?'
_pd_proc_ls_pref_orient_corr
;
;
 
_pd_proc_ls_prof_R_factor         0.034      
_pd_proc_ls_prof_wR_factor        0.052      
_pd_proc_ls_prof_wR_expected      0.037      
_refine_special_details
;
;
 
_refine_ls_structure_factor_coef    Inet
_refine_ls_matrix_type              ?
_refine_ls_weighting_sheme          '?'
_refine_ls_hydrogen_treatment       noref
_refine_ls_extinction_method        none
_refine_ls_extinction_coef          ?
_refine_ls_number_parameters        ?
_refine_ls_number_constraints        0         
_refine_ls_goodness_of_fit_all      1.42       
 
 
#--eof--eof--eof--eof--eof--eof--eof--eof--eof--eof--eof--eof--eof--eof--eof--#
